# Supplementary material for: Capillary column coated with graphene quantum dots for gas chromatographic separation of alkanes and aromatic isomers
Source: Royal Society of Chemistry journal article supplement (doi:10.1039/c4ay03068k), 2015-01-01
Supplement: c4ay03068k1.pdf [file c4ay03068k1.pdf]

## Supplementary Data

# Capillary Column Coated with Graphene Quantum Dots for Gas Chromatographic Separation of Alkanes and Aromatic Isomers

Xueyan Zhang<sup>a</sup>, Hongyun Ji<sup>b</sup>, Xudong Zhang<sup>b</sup>, Zhen Wang<sup>a</sup>, and Dan Xiao <sup>a,b\*</sup>

<sup>a</sup> College of Chemistry, Sichuan University, Chengdu, 610064, P. R. China

<sup>b</sup> College of Chemical Engineering, Sichuan University, Chengdu, 610065, P. R. China

\*Corresponding author:

E-mail: [xiaodan@scu.edu.cn](mailto:xiaodan@scu.edu.cn) (Dan Xiao)

Tel: +86-28-85415029

Fax: +86-28-85416029

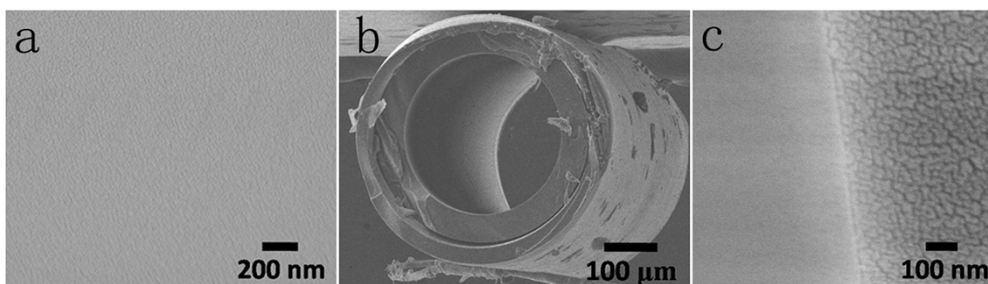

**Fig. S1** (a) Typical SEM images of bare fused silica capillary wall treated with 1 M NaOH for 2 h; (b) the SEM image of the GQDs coated capillary column; (c) SEM image of the cross section view of the cut capillary column.

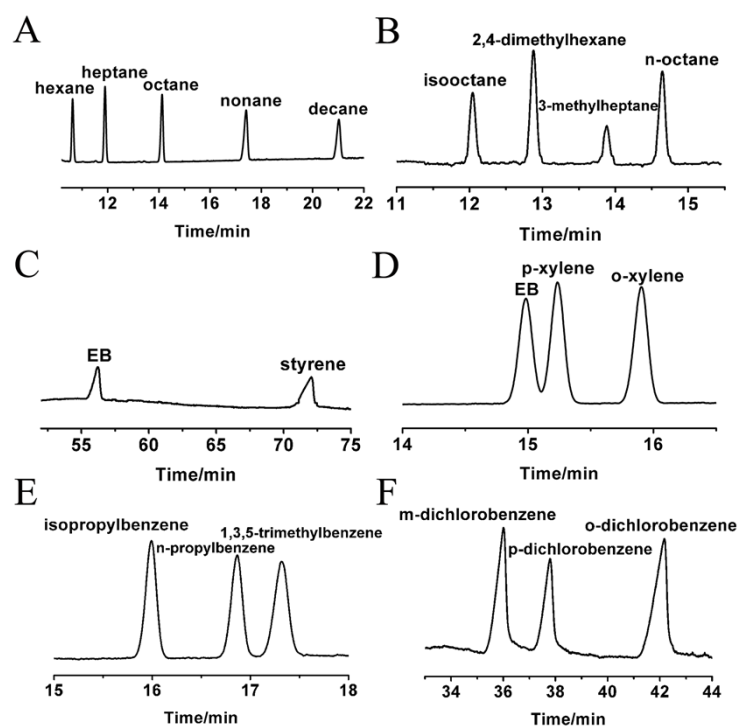

**Fig. S2** Gas chromatograms on the commercial HP-5 capillary column (30 m long  $\times$  0.32 mm i.d.  $\times$  0.25  $\mu$ m film thickness) at a  $N_2$  flow rate of 0.7 mL  $\text{min}^{-1}$  for the separation of: (A) hexane, heptane, octane, nonane, decane at 80  $^{\circ}\text{C}$  for 10 min, then 15  $^{\circ}\text{C min}^{-1}$  to 170  $^{\circ}\text{C}$ ; (B) isooctane, 2,4-dimethylhexane, 3-methylheptane, n-octane at 80  $^{\circ}\text{C}$  for 11 min, then 10  $^{\circ}\text{C min}^{-1}$  to 140  $^{\circ}\text{C}$ ; (C) EB and styrene at 40  $^{\circ}\text{C}$ ; (D) EB, p-xylene and o-xylene using a temperature program of 100  $^{\circ}\text{C}$  for 11 min, then 10  $^{\circ}\text{C min}^{-1}$  to 170  $^{\circ}\text{C}$ ; (E) isopropylbenzene, n-propylbenzene, 1,3,5-

trimethylbenzene at 110 °C for 12 min, then 10 °C min<sup>-1</sup> to 160 °C ; (F) m-, p-, o-dichlorobenzene at 80 °C.

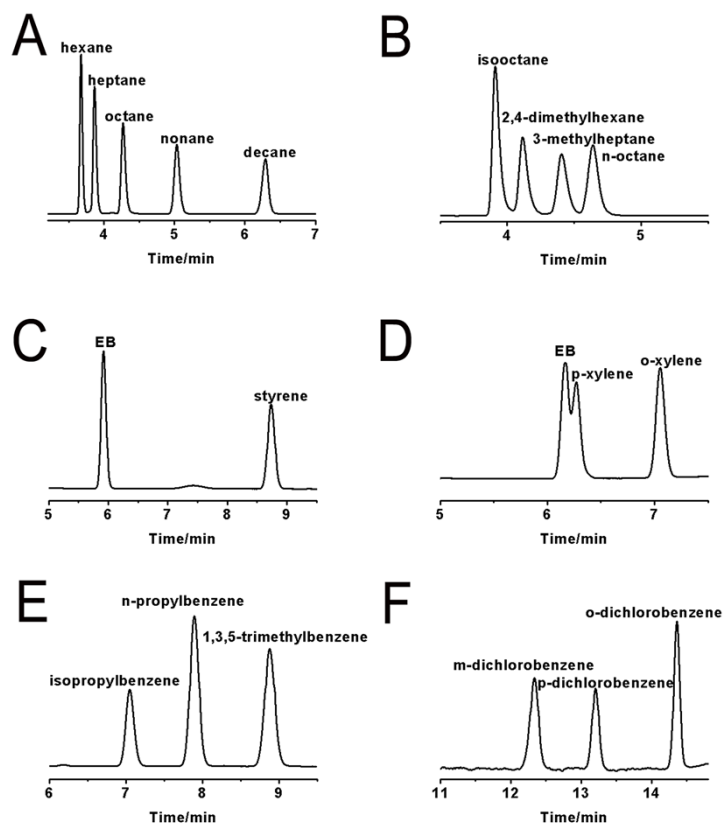

**Fig. S3** Gas chromatograms on the commercial HP-innowax capillary column (20 m long  $\times$  0.32 mm i.d.  $\times$  0.25  $\mu$ m film thickness) at a N<sub>2</sub> flow rate of 0.7 mL min<sup>-1</sup> for the separation of: (A) hexane, heptane, octane, nonane, decane at 70 °C for 3.5 min, then 10 °C min<sup>-1</sup> to 120 °C; (B) isooctane, 2,4-dimethylhexane, 3-methylheptane, n-octane at 60 °C; (C) EB and styrene at 100 °C; (D) EB, p-xylene and o-xylene using a temperature program of 100 °C for 6 min, then 10 °C min<sup>-1</sup> to 130 °C; (E) isopropylbenzene, n-propylbenzene, 1,3,5-trimethylbenzene at 100 °C; (F) m-, p-, o-dichlorobenzene using a temperature program of 110 °C for 12 min, then 20 °C min<sup>-1</sup> to 180 °C.

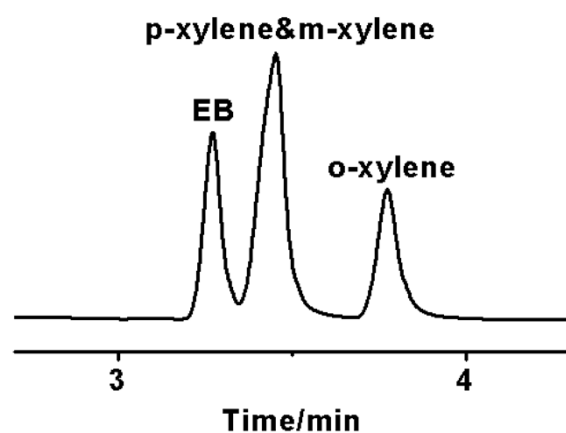

**Fig. S4** Gas chromatograms on the GQDs coated capillary column (22 m long  $\times$  0.32 mm i.d.) at a  $N_2$  flow rate of  $0.7 \text{ mL min}^{-1}$  for the separation of EB, m-xylene, p-xylene, o-xylene at  $55^\circ\text{C}$ .

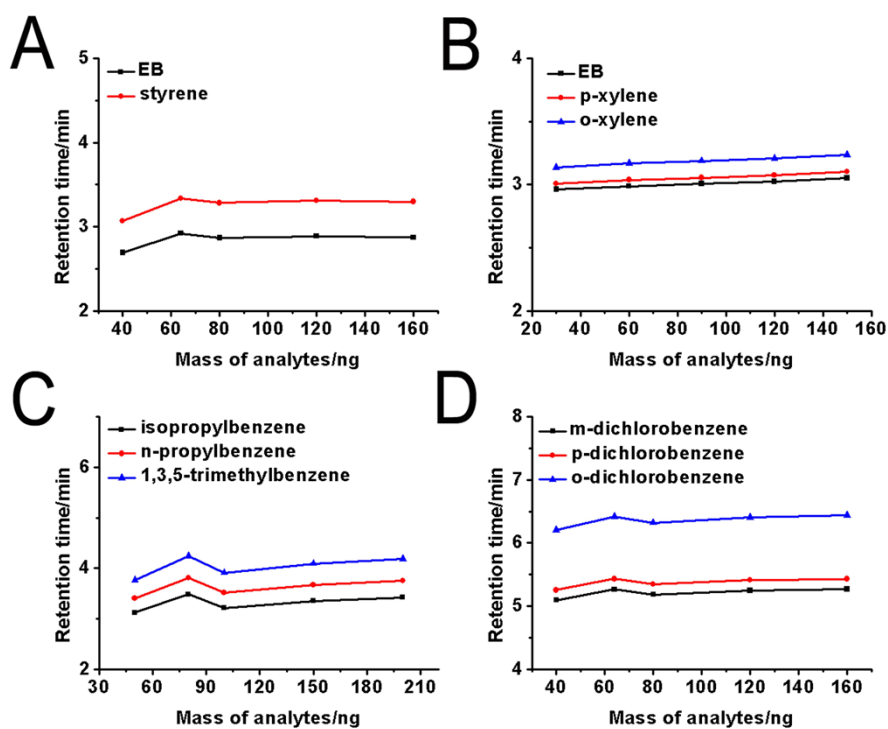

**Fig. S5** Effect of injected analyte mass on the retention time for the separation of: (A) EB and styrene; (B) EB and xylene isomers; (C) propylbenzene isomers; (D) dichlorobenzene isomers.

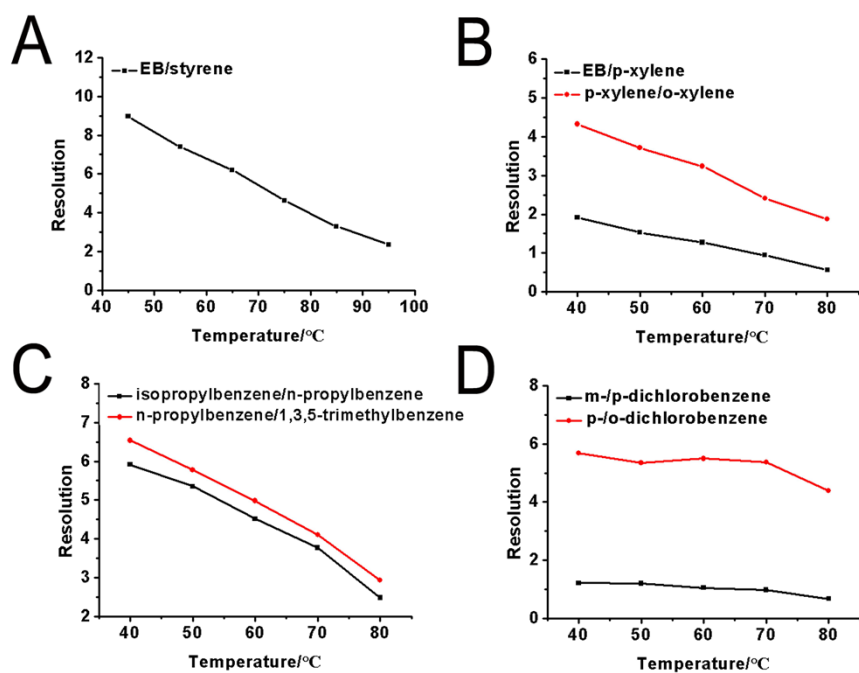

**Fig. S6** Influence of temperature on resolution for the separation of (A) EB and styrene; (B) EB and xylene isomers; (C) propylbenzene isomers; (D) dichlorobenzene isomers.
